# Supplementary material for: A one-step dual modification strategy for enhancing sodium storage in O3-type NaNi 1/3 Fe 1/3 Mn 1/3 O 2 cathodes
Source: Royal Society of Chemistry journal article supplement (doi:10.1039/d5ta02330k), 2025-01-01
Supplement: d5ta02330k1.pdf [file d5ta02330k1.pdf]

## Supporting Information

### Enhancing sodium storage performance of O3-type $\text{NaNi}_{1/3}\text{Fe}_{1/3}\text{Mn}_{1/3}\text{O}_2$ cathode through a one-step double modification strategy

Yan Wang,<sup>a</sup> Mengjie Zhang,<sup>a</sup> You Shi,<sup>a</sup> Huan Liu,<sup>\*b</sup> Dan Sun,<sup>\*a</sup> Xiaobing Huang,<sup>\*c</sup>  
Ning Ding,<sup>a</sup> Yan Xu,<sup>a</sup> Yougen Tang,<sup>a</sup> Haiyan Wang,<sup>\*a</sup>

<sup>a</sup>Hunan Provincial Key Laboratory of Chemical Power Sources, College of Chemistry  
and Chemical Engineering, Central South University, Changsha 410083, P.R China

<sup>b</sup>College of Materials Science and Engineering, Hunan Provincial Key Lab of  
Advanced Materials for New Energy Storage and Conversion, Hunan University of  
Science and Technology, Xiangtan 411201, P.R China

<sup>c</sup>College of Chemistry and Materials Engineering, Hunan University of Arts and  
Science, Changde 415000, P.R China

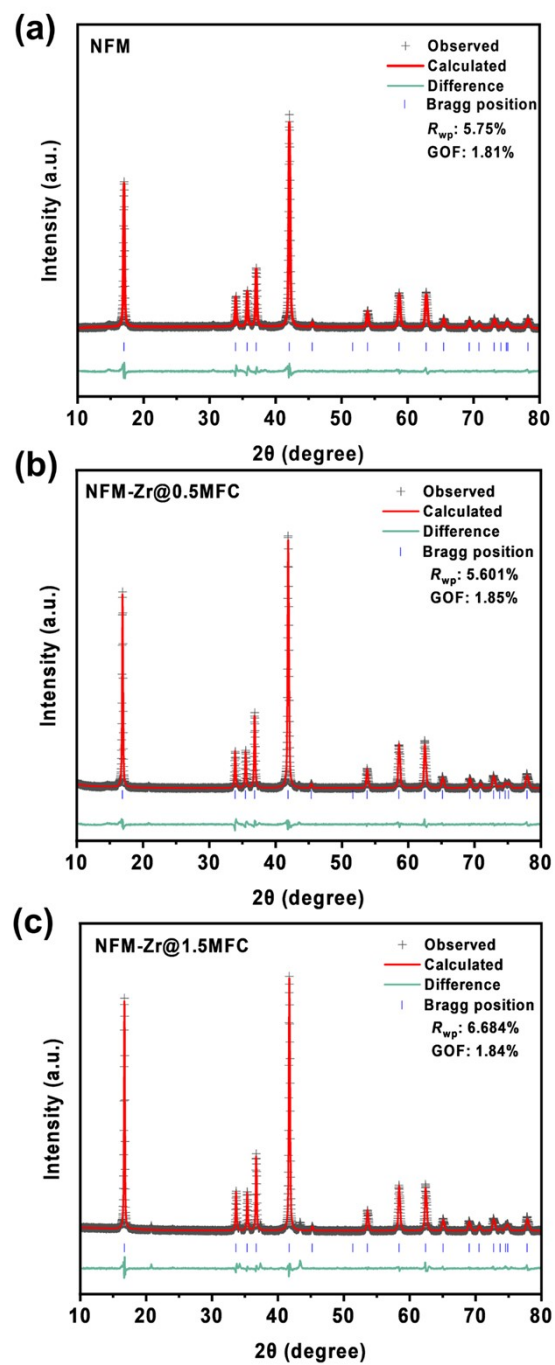

**Fig. S1.** XRD refinement patterns for (a) NFM, (b) NFM-Zr@0.5MFC and (c) NFM-Zr@1.5MFC

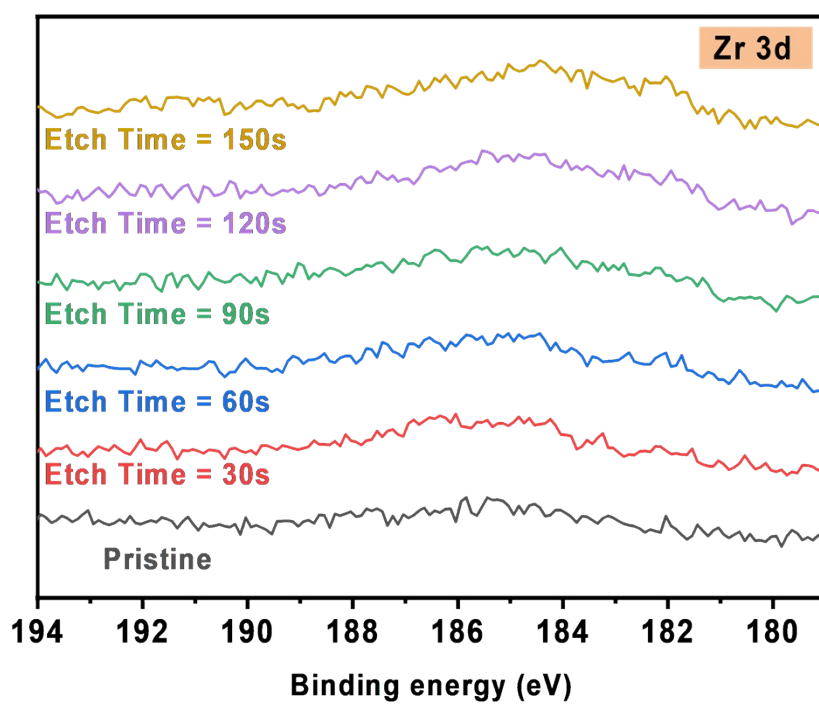

**Fig. S2.** Zr 3d XPS patterns at different etching depths

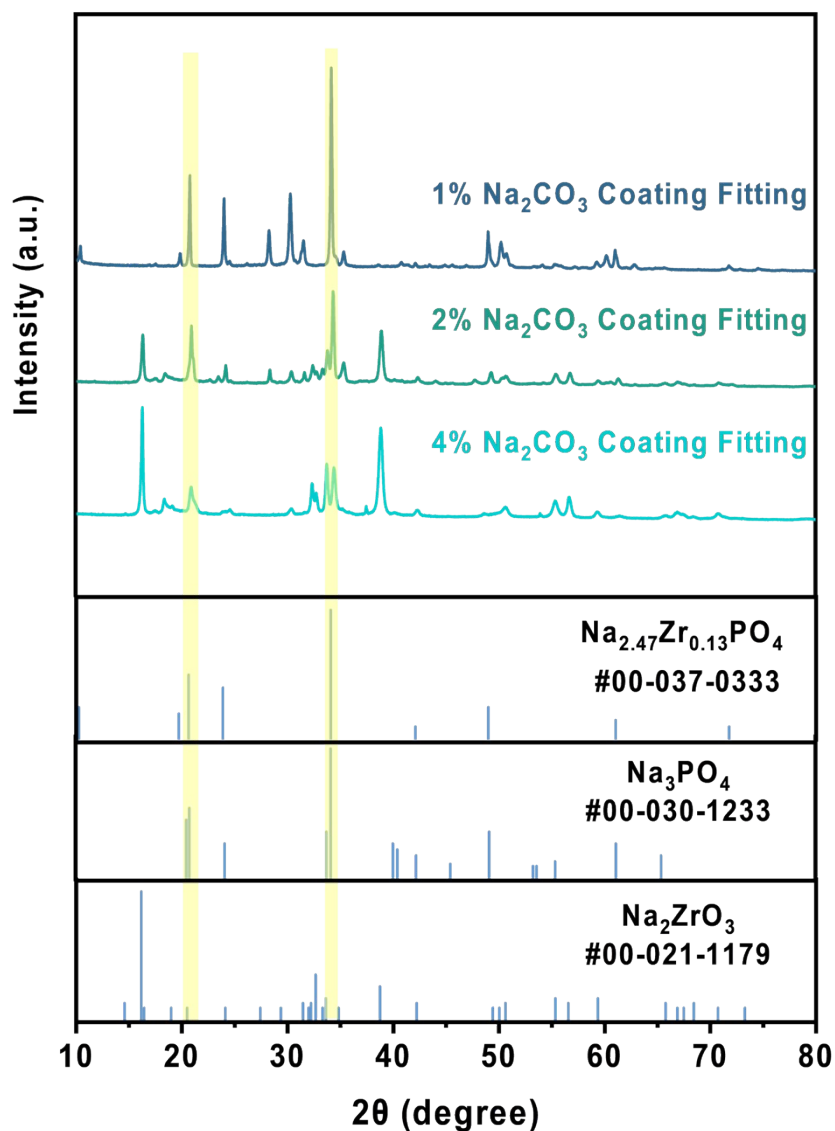

**Fig. S3.** XRD patterns of fitted cladding layers obtained by reacting different sodium carbonate contents ( $x=0.04, 0.02, 0.01$  mol) with  $\text{ZrO}(\text{NO}_3)_2 \cdot x\text{H}_2\text{O}$  ( $y=0.005$  mol),  $\text{NH}_4\text{H}_2\text{PO}_4$  ( $z=0.0075$  mol) and their corresponding PDF cards. The yellow region represents the peak corresponding to the new appearance of NFM-Zr@1.0MFC.

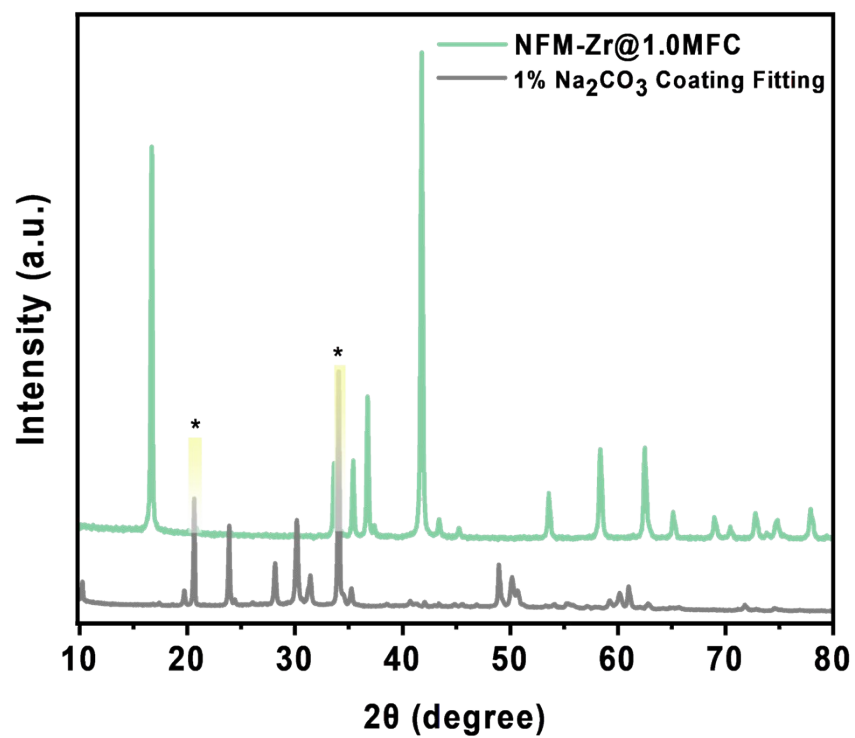

**Fig. S4.** MFC coating layer after 900°C/15 h heat treatment compared with NFM-Zr@1.0MFC

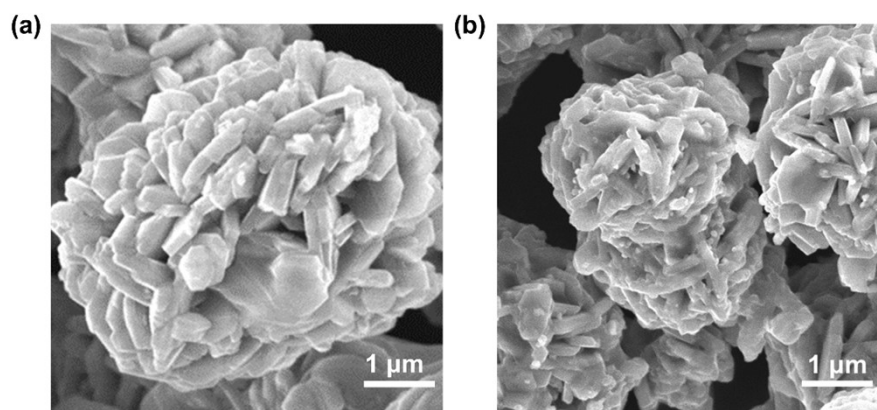

**Fig. S5.** SEM images of (a) NFM-Zr@0.5MFC and (b) NFM-Zr@1.5MFC.

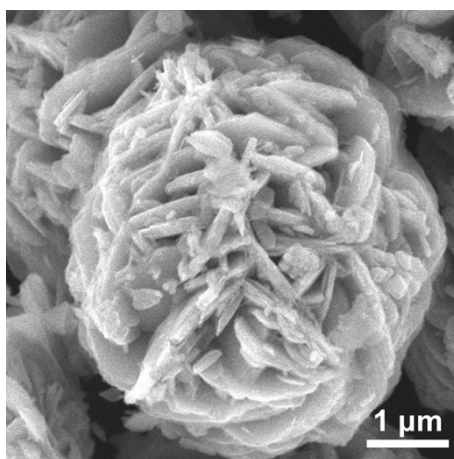

**Fig. S6.** SEM of  $\text{Ni}_{1/3}\text{Fe}_{1/3}\text{Mn}_{1/3}(\text{OH})_2$  precursor

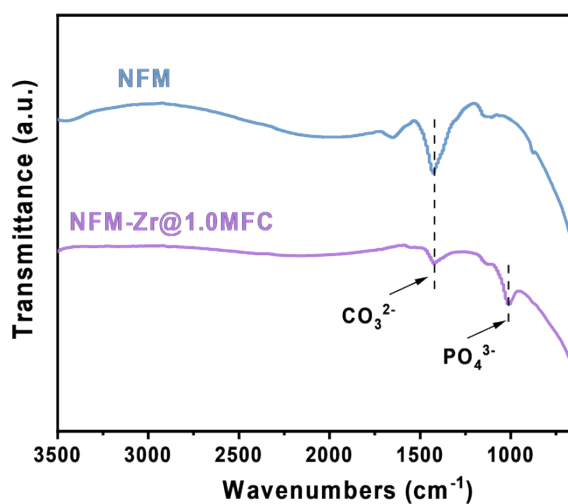

**Fig. S7.** Infrared spectra for NFM and NFM-Zr@1.0MFC

## Surface Residual Alkali Analysis via Chemical Titration Method<sup>1</sup>

### 1. Sodium Hydroxide (NaOH) Quantification

The NFM sample (0.5 g) was initially immersed in 10 mL of ethanol under vigorous stirring for 5 minutes to dissolve surface sodium hydroxide. The resulting suspension underwent filtration through a Buchner funnel to collect the NaOH-ethanol solution. The filtrate was quantitatively transferred to a 250 mL conical flask and diluted with

deionized water to a final volume of 200 mL. Methyl orange indicator was added, and the solution was titrated against standardized HCl until the endpoint transition from yellow to orange (pH 3.1-4.4). The NaOH content was calculated using the relationship (Eq. S1):

$$C_{NaOH} = \frac{V_{HCl} \times M_{HCl} \times M_{NaOH}}{m_{sample}} \quad (1)$$

Where  $V_{HCl}$  represents the consumed titrant volume,  $M_{HCl}$  the HCl molarity,  $M_{NaOH}$  the molecular weight of NaOH (40.00 g/mol), and  $m_{sample}$  the initial sample mass. The residual powder was collected for subsequent analysis.

## 2. Sodium Carbonate (Na<sub>2</sub>CO<sub>3</sub>) Determination

The filtered NFM powder was subsequently stirred with 10 mL of ethylene glycol in a beaker for 5 minutes to extract the surface carbonate material. After filtration, the Na<sub>2</sub>CO<sub>3</sub> ethylene glycol solution was transferred to a clean conical flask and diluted to 200 mL with deionized water. Following addition of methyl orange indicator, the solution was titrated with standardized 0.1 M HCl until persistent orange coloration. The Na<sub>2</sub>CO<sub>3</sub> concentration was determined using (Eq. S2):

$$C_{Na_2CO_3} = \frac{V_{HCl} \times M_{HCl} \times M_{Na_2CO_3}}{2 \times m_{sample}} \quad (2)$$

Where  $M_{Na_2CO_3}$  denotes the molecular weight of sodium carbonate (105.99 g/mol), All titrations were performed in triplicate with temperature control at 25±0.5°C.

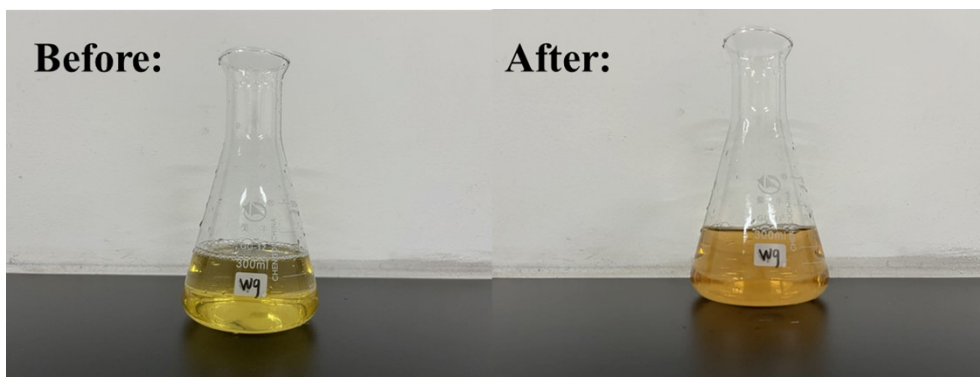

**Fig. S8.** A schematic diagram depicting color changes before and after titration

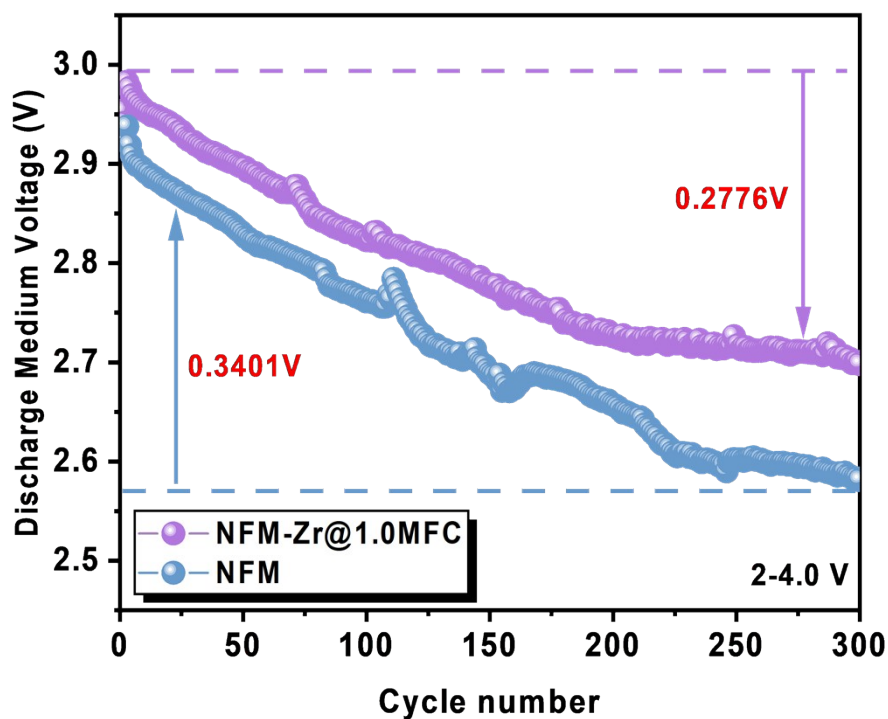

**Fig. S9.** Decay of discharge medium voltage of NFM and NFM-Zr@1.0MFC after 300 cycles at 1C

The fitted linear relationship indicates that the  $\text{Na}^+$  diffusion coefficient ( $D$ ) can be evaluated by the following Randles-Sevcik (Eq. S3):

$$I_p = 2.69 \times 10^5 n^{3/2} A D^{1/2} C v^{1/2} \quad (3)$$

In the equation,  $I_p$  represents the peak current at various scan rates (A),  $n$  denotes the number of electrons involved in the redox reaction,  $A$  signifies the contact area



between the two electrodes,  $D$  is the diffusion coefficient of  $\text{Na}^+$ ,  $v$  represents the scan rate ( $\text{V s}^{-1}$ ), and  $C$  is the concentration of  $\text{Na}^+$  participating in the reaction.

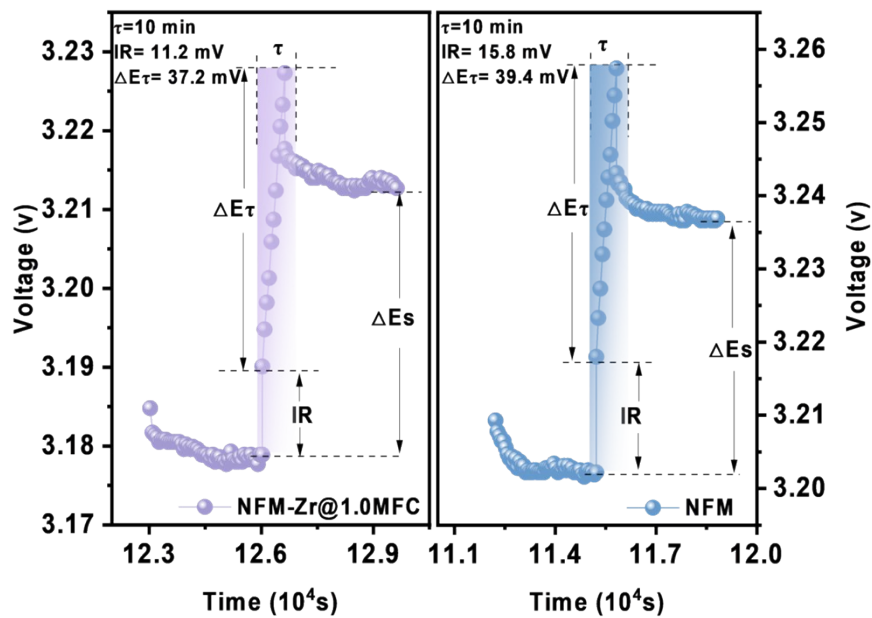

**Fig. S10.** An enlarged view of one GITT cycle for both NFM-Zr@1.0MFC and NFM

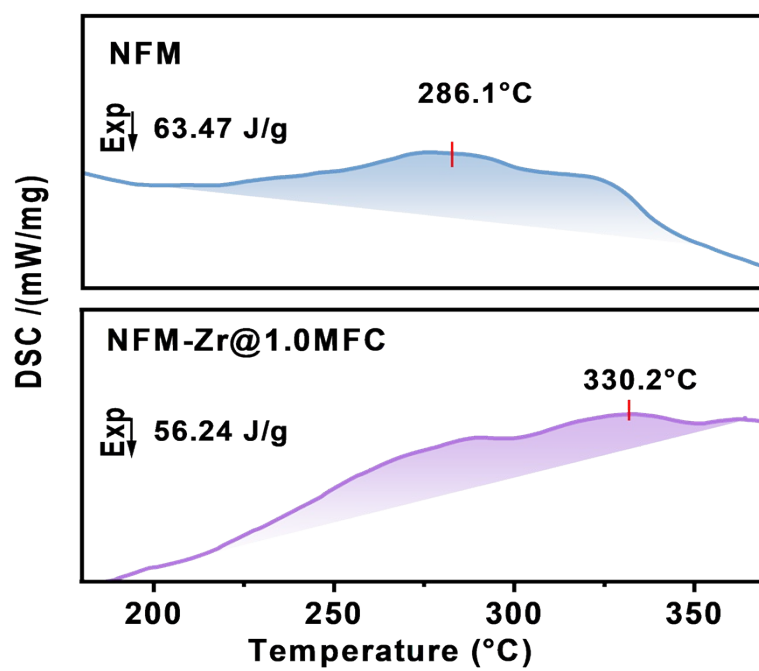

**Fig. S11.** DSC curves of NFM and NFM-Zr@1.0MFC in the charged state at 4.0 V.

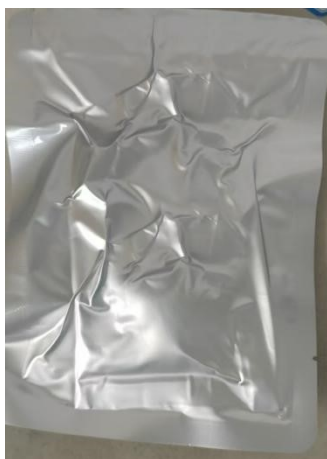

**Fig. S12.** Materials for vacuum encapsulation

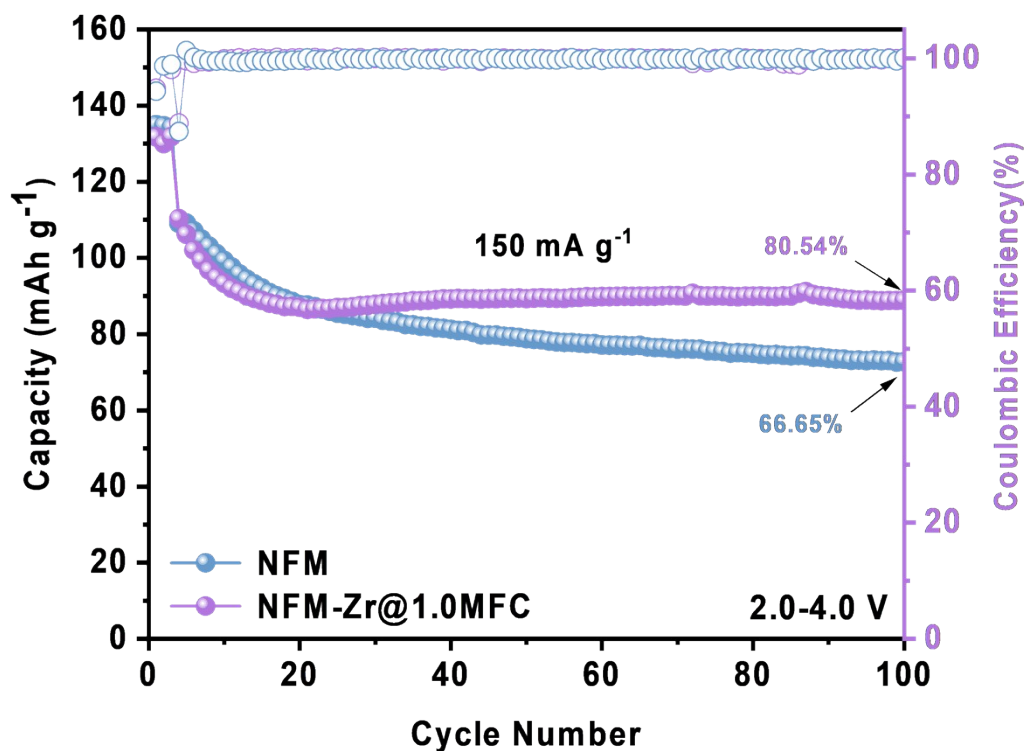

**Fig. S13.** The cycling performance of NFM and NFM-Zr@1.0MFC after one year of vacuum packaging.

**Table S1.** Crystal structure refinement of NFM, NFM-Zr@0.5MFC, NFM-Zr@1.0MFC and NFM-Zr@1.5MFC

|                       | NFM     | NFM-Zr@0.5MFC | NFM-Zr@1.0MFC | NFM-Zr@1.5MFC |
|-----------------------|---------|---------------|---------------|---------------|
| a(Å)                  | 2.98352 | 2.98179       | 2.9793        | 2.9759        |
| c(Å)                  | 16.0041 | 16.01381      | 16.03425      | 16.0406       |
| 1                     |         |               |               |               |
| c/a                   | 5.36417 | 5.37053       | 5.38188       | 5.39016       |
| V(Å <sup>3</sup> )    | 123.373 | 123.304       | 123.262       | 123.025       |
| S <sub>MO2</sub> (Å)  | 2.23753 | 2.21412       | 2.17667       | 2.1672        |
| I <sub>NaO2</sub> (Å) | 3.10722 | 3.12368       | 3.15804       | 3.17967       |
| TM-O                  | 2.05195 | 2.04676(4)    | 2.03755(3)    | 2.03131(5)    |
| lenth(Å)              | (3)     |               |               |               |
| Na-O                  | 2.31789 | 2.32443(4)    | 2.33676(3)    | 2.34086(4)    |
| lenth(Å)              | (3)     |               |               |               |
| Rwp(%)                | 5.75    | 5.601         | 6.764         | 6.684         |
| GOF                   | 1.81    | 1.85          | 2.18          | 1.84          |

**Table S2.** XRD refinement parameters for NFM

| NFM  |      |   |   | Space group: $R\bar{3}m$ |        |
|------|------|---|---|--------------------------|--------|
| Atom | Site | X | Y | Z                        | Occ.   |
| Na   | 3a   | 0 | 0 | 0                        | 1.000  |
| Ni   | 3b   | 0 | 0 | 0.5                      | 0.3333 |
| Fe   | 3b   | 0 | 0 | 0.5                      | 0.3333 |
| Mn   | 3b   | 0 | 0 | 0.5                      | 0.3333 |
| O    | 6c   | 0 | 0 | 0.23467                  | 1.000  |

**Table S3.** XRD refinement parameters for NFM-Zr@1.0MFC

| NFM-Zr@1.0MFC |      |   |   | Space group: $R\bar{3}m$ |       |
|---------------|------|---|---|--------------------------|-------|
| Atom          | Site | X | Y | Z                        | Occ.  |
| Na            | 3a   | 0 | 0 | 0                        | 1.000 |
| Ni            | 3b   | 0 | 0 | 0.5                      | 0.330 |
| Fe            | 3b   | 0 | 0 | 0.5                      | 0.332 |
| Mn            | 3b   | 0 | 0 | 0.5                      | 0.333 |
| Zr            | 3b   | 0 | 0 | 0.5                      | 0.007 |
| O             | 6c   | 0 | 0 | 0.23644                  | 1.000 |

**Table S4.** Stoichiometry of the six as-prepared samples determined by ICP-OES

|                      | <b>Na</b> | <b>Ni</b> | <b>Fe</b> | <b>Mn</b> | <b>Zr</b> | <b>P</b> |
|----------------------|-----------|-----------|-----------|-----------|-----------|----------|
| <b>NFM</b>           | 1.025     | 0.330     | 0.338     | 0.331     |           |          |
| <b>NFM-Zr@0.5MFC</b> | 1.016     | 0.334     | 0.334     | 0.324     | 0.468%    | 0.678%   |
| <b>NFM-Zr@1.0MFC</b> | 1.003     | 0.329     | 0.331     | 0.322     | 0.973%    | 1.486%   |
| <b>NFM-Zr@1.5MFC</b> | 0.995     | 0.328     | 0.326     | 0.318     | 1.468%    | 2.176%   |

**Table S5.** Residual alkali titration results of NFM and NFM-Zr@1.0MFC

|               | pH    | Na <sub>2</sub> CO <sub>3</sub> | NaOH |
|---------------|-------|---------------------------------|------|
|               |       | wt%                             | wt%  |
| NFM           | 13.36 | 3.25                            | 0.02 |
| NFM-Zr@1.0MFC | 13.03 | 2.36                            | 0.01 |

The PH test is mainly referenced in ref 2 and the residual base titration procedure is referenced in ref 1.

**Table S6.** Comparison of high-voltage electrochemical performance for various sodium layered cathode materials.

| Cathode materials                                                                           | Voltage range<br>[V] | Capacity retention | Ref.             |
|---------------------------------------------------------------------------------------------|----------------------|--------------------|------------------|
| $\text{Na}[\text{Ni}_{0.5}\text{Co}_{0.2}\text{Mn}_{0.3}]_{0.7}\text{Ti}_{0.3}\text{O}_2$   | 2.0-4.3 V            | 68.1%(300cycles)   | 3                |
| $\text{NaNi}_{0.35}\text{Fe}_{0.2}\text{Mn}_{0.3}\text{Ni}_{0.1}\text{Sb}_{0.05}\text{O}_2$ | 1.9-4.1 V            | 76.0%(200cycles)   | 4                |
| $\text{NaNi}_{1/3}\text{Fe}_{1/3}\text{Mn}_{1/3}\text{O}_2$                                 | 2.0-4.3 V            | 68.8%(200cycles)   | 5                |
| $\text{NaCaPO}_4@\text{Na}_{2/3}[\text{Ni}_{1/3}\text{Mn}_{2/3}]\text{O}_2$                 | 2.5-4.3 V            | 74%(200cycles)     | 6                |
| $\text{Na}_2\text{Ti}_6\text{O}_{13}@\text{Na}_{0.6}\text{MnO}_2$                           | 2.0-4.1 V            | 78.8%(100cycles)   | 7                |
| $\text{NaPO}_3@\text{Na}_{2/3}[\text{Ni}_{1/3}\text{Mn}_{2/3}]\text{O}_2$                   | 1.5-4.3 V            | 80%(100cycles)     | 8                |
| NFM-Zr@1.0MFC                                                                               | 2.0-4.2 V            | 74.05%(300cycles)  | <b>This work</b> |

**Table S7.** The calculated ionic conductivity of potential coating compounds

| Formula                                               | Na <sup>+</sup> diffusion coefficient<br>(cm <sup>2</sup> s <sup>-1</sup> ) |
|-------------------------------------------------------|-----------------------------------------------------------------------------|
| Na <sub>2</sub> CO <sub>3</sub>                       | 0.716×10 <sup>-7</sup>                                                      |
| Na <sub>3</sub> PO <sub>4</sub>                       | 3.92×10 <sup>-7</sup>                                                       |
| Na <sub>2</sub> ZrO <sub>3</sub>                      | 10.7×10 <sup>-7</sup>                                                       |
| Na <sub>2.47</sub> Zr <sub>0.13</sub> PO <sub>4</sub> | 5.93×10 <sup>-5</sup>                                                       |

**Table S8.** Nyquist plot fitting results for NFM and NFM-Zr@1.0MFC electrodes at different temperatures

| Temperatures | NFM                |                    |                     | NFM-Zr@1.0MFC      |                    |                     |
|--------------|--------------------|--------------------|---------------------|--------------------|--------------------|---------------------|
|              | R <sub>s</sub> (Ω) | R <sub>f</sub> (Ω) | R <sub>ct</sub> (Ω) | R <sub>s</sub> (Ω) | R <sub>f</sub> (Ω) | R <sub>ct</sub> (Ω) |
| 25°C         | 2.378              | 297.01             | 112.64              | 2.275              | 249.73             | 117.47              |
| 40°C         | 2.275              | 151.69             | 57.06               | 2.208              | 109.27             | 49.66               |
| 60°C         | 2.127              | 140.75             | 34.64               | 2.106              | 91.04              | 29.4                |
| 80°C         | 1.847              | 160.18             | 29.92               | 1.62               | 104.92             | 30.24               |





## References

1. Y. You, A. Dolocan, W. Li and A. Manthiram, *Nano Lett*, 2019, **19**, 182-188.
2. M. Yoon, Y. Dong, J. Hwang, J. Sung, H. Cha, K. Ahn, Y. Huang, S. J. Kang, J. Li and J. Cho, *Nature Energy*, 2021, **6**, 362-371.
3. L. Tan, Q. Wu, Z. Liu, Q. Chen, H. Yi, Z. Zhao, L. Song, S. Zhong, X. Wu and L. Li, *J Colloid Interface Sci*, 2022, **622**, 1037-1044.
4. L. Liu, Y. Xin, Y. Wang, X. Ding, Q. Zhou, Z. Wang, W. Huang and H. Gao, *Journal of Materials Chemistry A*, 2024, **12**, 23495-23505.
5. X. Zhao, L. Zhang, X. Wang, J. Li, L. Zhang, D. Liu, R. Yang, X. Jin, M. Sui and P. Yan, *Journal of Materials Chemistry A*, 2024, **12**, 11681-11690.
6. C. H. Jo, J. H. Jo, H. Yashiro, S. J. Kim, Y. K. Sun and S. T. Myung, *Advanced Energy Materials*, 2018, **8**.
7. Y. Liu, D. Wang, J. Liu, Y. Liu, S. Gao, Q. Hu, Z. Wu, X. Chen, B. Zhong and X. Guo, *Journal of Alloys and Compounds*, 2020, **849**.
8. J. H. Jo, J. U. Choi, A. Konarov, H. Yashiro, S. Yuan, L. Shi, Y. K. Sun and S. T. Myung, *Advanced Functional Materials*, 2018, **28**.
